# Supplementary material for: Strong degradation of palsas and peat plateaus in northern Norway during the last 60 years
Source: Copernicus journal article supplement (doi:10.5194/tc-2016-12), 2016-02-05
Supplement: Supplementary file [file tc-2016-12-AC3-supplement.pdf]

SC1, Ylva Sjöberg.

We thank Ylva Sjöberg for her comments to our study and the additional references provided. All mentioned studies are cited in the revised version of the manuscript:

**Kurylyk, B. L., M. Hayashi, W. L. Quinton, J. M. McKenzie, and C. I. Voss (2016), Influence of vertical and lateral heat transfer on permafrost thaw, peatland landscape transition, and groundwater flow, *Water Resour. Res.*, 52, doi:10.1002/2015WR018057.**

This reference is now included in the new manuscript in Sect. 5.3 and 5.4.

**Sjöberg, Y., P. Marklund, R. Pettersson, and S. W. Lyon (2015), Geophysical mapping of palsa peatland permafrost, *The Cryosphere*, 9(2), 465-478.**

This reference is now included in the new manuscript in Sect. 3 and 5.3.

**Åkerman, H. J., and Johansson, M.: Thawing permafrost and thicker active layers in sub-arctic Sweden, *Permafrost Periglac.*, 19, 279-292, 10.1002/ppp.626, 2008.**

This reference is now included in the new manuscript in Sect. 5.3.

**Payette, S., A. Delwaide, M. Caccianiga, and M. Beauchemin (2004), Accelerated thawing of subarctic peatland permafrost over the last 50 years, *Geophysical Research Letters*, 31(18).**

This reference is incorporated in Sect. 1 and 5.2.

On behalf of the authors,

Amund F. Borge
